# Supplementary material for: The Impact of Incorporating Multiple Best Practices on Live Outcomes for a Municipal Animal Shelter in Memphis, TN
Source: Frontiers journal article supplement (doi:10.3389/fvets.2022.786866), 2022-06-24
Supplement: Data_Sheet_1.pdf [file Data_Sheet_1.pdf]

## TIPS FOR CONTACTING RESCUE GROUPS

- Be patient and polite! Most rescue groups are run 100% by volunteers with full-time jobs.
- Contact them ONLY if your pet fits their intake criteria.
- Send as much information about your pet as possible, including:
  - Multiple photos
  - Age, Weight, Sex, Breed
  - Spayed or Neutered?
  - Vaccination & Heartworm Status
  - Temperament: Does your pet get along with adults? Kids? Dogs? Cats? Share anything you know about your pet's personality.
- Offer to foster if at all possible! Most groups don't have a facility, so they rely on foster homes to be able to take in a pet. If you can keep your pet while they try to find a new home for him, or even just for a few days while they look for a foster, that can be a huge help!
- If you're willing to help pay for costs associated with rehoming your pet, like medical bills, food, or supplies, let them know that! Most rescues run completely on donations.

### DOGS ONLY

#### BREED-SPECIFIC DOG RESCUES

##### Belly Rubs Basset Rescue

Email: [bellyrubbr@bellyrubr.org](mailto:bellyrubbr@bellyrubr.org)  
Basset hounds & basset hound mixes

##### Boston Terrier Rescue of East TN

Phone: 865-983-3272  
Email: [rjraibley@yahoo.com](mailto:rjraibley@yahoo.com)  
Boston Terriers, Pugs, & French Bulldogs

##### Bullmastiff Rescuers, Inc.

Email: [leia.peia1@yahoo.com](mailto:leia.peia1@yahoo.com)  
Bulmastiffs

##### Imminent Danger German Shepherd Rescue

Online owner surrender form:  
<http://members.petfinder.com/~TN668/01.html>  
Email: [imindangersrescue@gmail.com](mailto:imindangersrescue@gmail.com)  
German Shepherds

##### Memphis Area Golden Retriever Rescue

Email: [intake@magrr.org](mailto:intake@magrr.org)  
Golden Retriever or Golden Retriever mixes.  
Must be friendly to people & dogs.

##### Mid-South Pug Rescue

Phone: 901-209-9784 / 901-488-9195  
Purebred pugs

##### North Mississippi Great Dane Rescue

Phone: 901-461-5997  
Email: [nmsgdr@hotmail.com](mailto:nmsgdr@hotmail.com)  
Great Danes or Great Dane mixes

##### Tails of Hope Dog Rescue

[tailsofhopedr@yahoo.com](mailto:tailsofhopedr@yahoo.com)  
English Bulldogs, German Shepherds, Pomeranians, Dachshunds, Yorkies, French Bulldogs, Pugs, Puggles, Boston Terriers (You may also contact them about pigs, chickens, & goats!)

##### West Tennessee Border Collie Rescue

## NO LUCK WITH LOCAL RESCUE GROUPS?

Go online to [Rehome.AdoptAPet.com](http://Rehome.AdoptAPet.com) for a safe, no-cost way to rehome your pet.

See below for more info from their website.

### How It Works

We believe that rehoming pets should be easy and stress free both for you and your pet. Our experts at Adopt-a-Pet.com, the largest non-profit pet adoption website, with support from The Petco Foundation, have created a simple, reliable program to help you place your pet from your home directly to another.

- 1 Create A Pet Profile**  
Get your pet posted on our site to be seen by millions of visitors each month.
- 2 Review Applications**  
Don't worry! Our dedicated team will give you all the help you need to select the best potential adopters.
- 3 Meet Adopters**  
We'll guide you through the process of setting safe and pressure-free meetings with applicants.
- 4 Finalize Adoption**  
We'll provide you with an adoption contract to protect the transfer of your pet ownership.

## SKIP THE SHELTER!

Help ensure a happy ending for your pet by working with a rescue group!

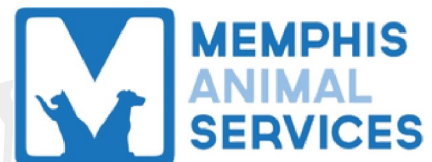

2350 APPLING CITY CV., MEMPHIS, TN 38133  
901-636-1416 | [MEMPHISANIMALSERVICES.COM](http://MEMPHISANIMALSERVICES.COM)

### DOGS ONLY

#### GENERAL DOG RESCUES

##### A Little Bit of Snuggles/HappiDog Rescue

Email: [happidogrescue@gmail.com](mailto:happidogrescue@gmail.com)  
Send an email to let them know if the dog is people-friendly, dog-friendly, up-to-date on vaccines, heartworm-positive or heartworm-negative, age, current housing status (indoor or outdoor). Photos are also helpful.

##### Real Good Dog Rescue

Phone: 865-652-9781  
Email: [ltrenthem@gmail.com](mailto:ltrenthem@gmail.com)  
If you're able to keep your dog for a few days, Real Good Dog Rescue may be able to take them. They often need a few days to find a foster or adopter.

##### Wilson Animal Rescue

Email: [info@wilsonanimalrescue.com](mailto:info@wilsonanimalrescue.com)  
Dog- and kid-friendly required. Wilson is open to any breed, age, and medical status. They will need time to find a foster, and you can help by offering to hold on to your dog for a few days to a week.

##### Guardian Angel Pet Rescue

Email: [debbie.homas@gmail.com](mailto:debbie.homas@gmail.com)  
Phone: 901-568-9327  
Smaller dogs

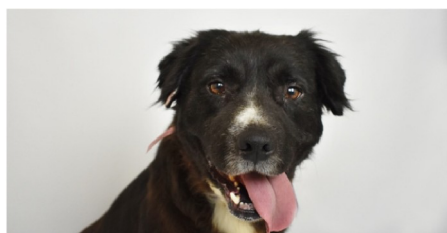

### BOTH DOGS & CATS

#### GENERAL DOG & CAT RESCUES

##### Meadow Wood Rescue

Email: [syoung0500@aol.com](mailto:syoung0500@aol.com)  
Specializes in elderly or injured dogs & cats

##### Perfect Match Animal Rescue

Email: [pmar.application@gmail.com](mailto:pmar.application@gmail.com)  
Can often advise and assist with programs to help, training methods, supplies & pet expenses. PMAR tries to take as many pets as space and foster homes allow.

##### Sunny Meadows

Email: [insafehavenforpets@yahoo.com](mailto:insafehavenforpets@yahoo.com)  
Sunny Meadows will try to help when they have space. Smaller dogs are more likely to be accepted due to space.

##### Wright-Way Rescue

Email: [courtney.stone@wright-wayrescue.org](mailto:courtney.stone@wright-wayrescue.org)  
Takes all breeds of dogs, cats, puppies and kittens (and moms) on space-available basis. Priority given to pets with good temperaments.

### CATS ONLY

#### GENERAL CAT RESCUES

##### Kitty City/LUCRA

Email: [leggup@gmail.com](mailto:leggup@gmail.com)  
They are not able to take your cat from you, but they welcome owners needing to rehome their cat to bring fully tested, spayed/neutered, and vaccinated cats to their adoption events at Hollywood Feed on Saturdays and Sundays to help find them a new home. NOTE: Registration is required due to space. Email the address above to register.

##### Mewtopia

Phone: 901-503-9328  
May be able to help place younger cats.
