# Supplementary material for: The Impact of Incorporating Multiple Best Practices on Live Outcomes for a Municipal Animal Shelter in Memphis, TN
Source: Frontiers journal article supplement (doi:10.3389/fvets.2022.786866), 2022-06-24
Supplement: Data_Sheet_3.pdf [file Data_Sheet_3.pdf]

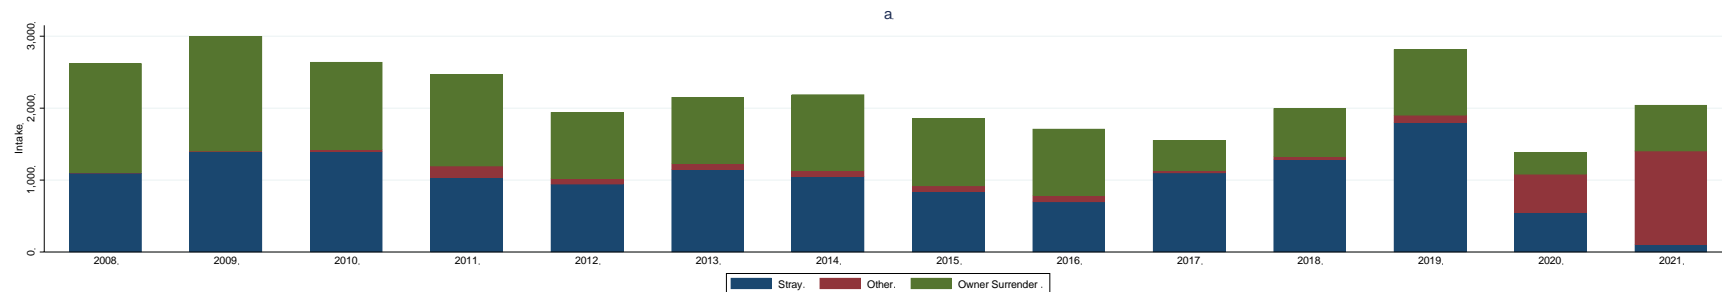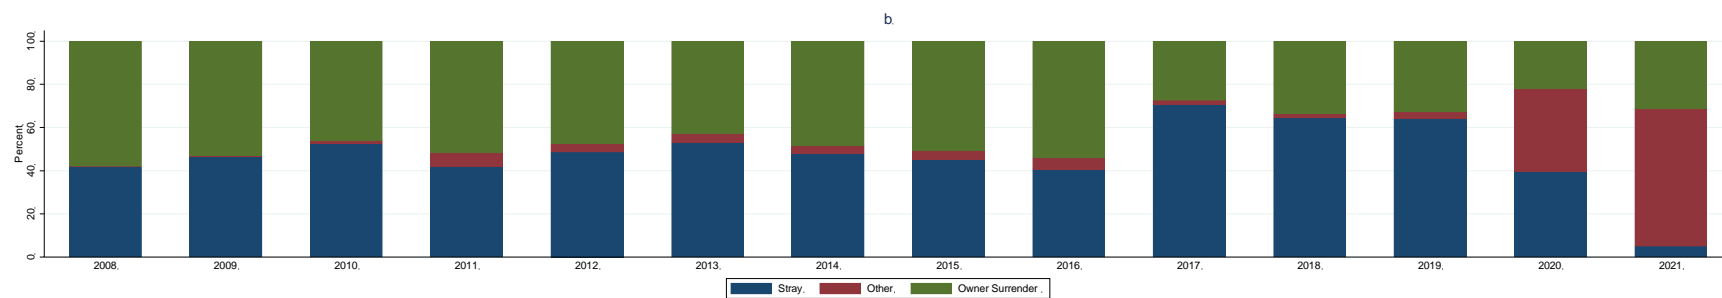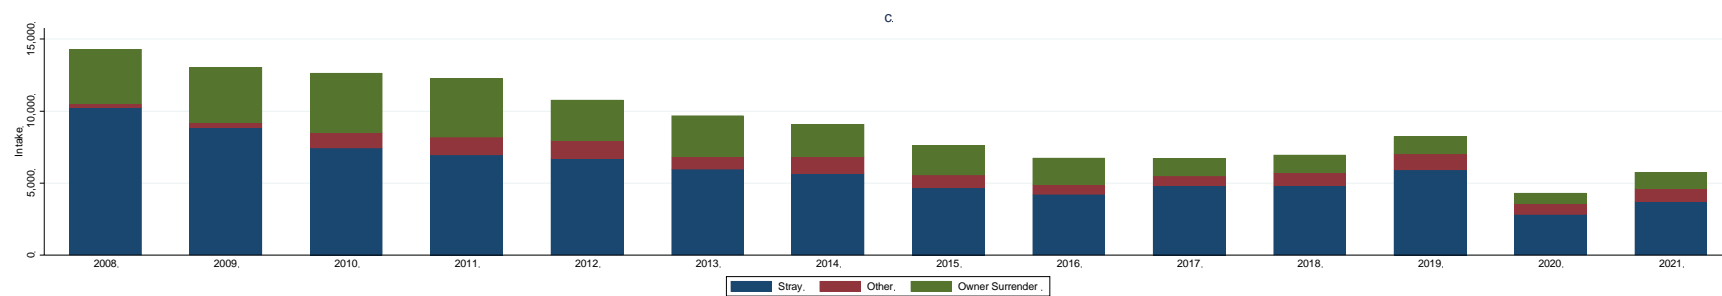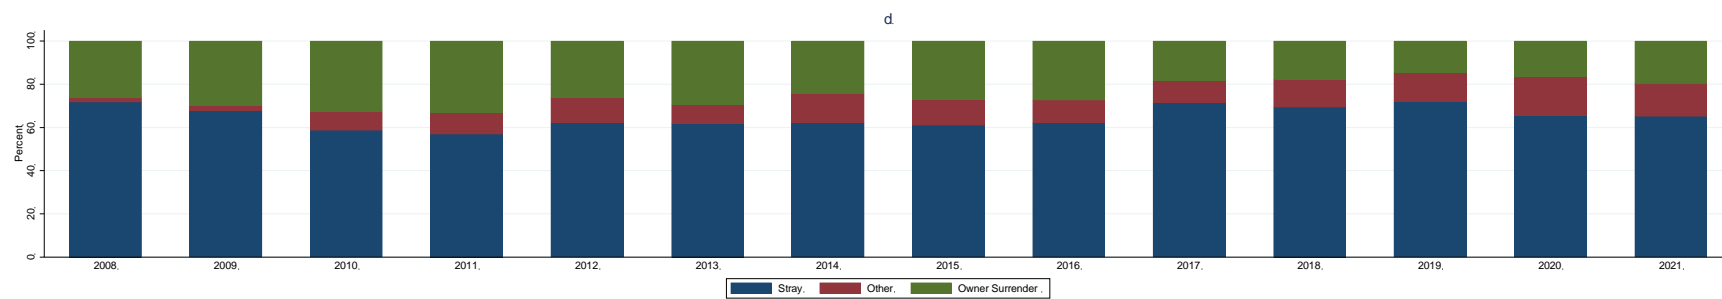

**Addendum 3** Stacked bar chart showing intake and intake type by year for cats by gross numbers (a) and as a percent of intake (b). Stacked bar chart showing intake and intake type by year for dogs by gross numbers (c) and as a percent of intake (d).
